# Supplementary material for: Efficiently mapping structure–property relationships of gas adsorption in porous materials: application to Xe adsorption
Source: Royal Society of Chemistry journal article supplement (doi:10.1039/c7fd00038c), 2017-01-01
Supplement: c7fd00038c1.pdf [file c7fd00038c1.pdf]

## Supplementary Information

### Efficiently mapping structure-property relationships of gas adsorption in porous materials: Application to Xe adsorption

Alec R. Kaija,<sup>a</sup> Christopher E. Wilmer<sup>a\*</sup>

<sup>a</sup>Department of Chemical & Petroleum Engineering,  
University of Pittsburgh, Pittsburgh, PA 15261, USA

\*To whom correspondence should be addressed. E-mail: [wilmer@pitt.edu](mailto:wilmer@pitt.edu)

#### Table of contents

Section S1. Randomly-generating pseudomaterials

Section S2. Simulation details

Section S3. Parent-selection algorithm

Section S4. Mutation algorithm

## S1. Randomly-generating pseudomaterials

Pseudomaterials are hypothetical material-analogues consisting of Lennard-Jones (LJ) spheres randomly positioned within a unit cell. We developed an algorithm to generate these pseudomaterials by randomly-selecting values to define their structural characteristics. For each parameter, a value was selected from the ranges presented Table S1.1:

**Table S1.1** Ranges of values used to define pseudomaterial structural parameters.

| Parameter                              | Minimum   | Maximum |
|----------------------------------------|-----------|---------|
| $\epsilon/k_b$ (K)                     | 1.258     | 513.264 |
| $\sigma$ (Å)                           | 1.052     | 6.549   |
| Number density (atoms/Å <sup>3</sup> ) | 0.0000149 | 0.02122 |
| Lattice constant (Å)                   | 25.6      | 51.2    |

To generate a pseudomaterial, first three crystallographic lattice parameters ( $a$ ,  $b$ ,  $c$ ) were selected in each of the  $x$ ,  $y$ , and  $z$ -directions. All crystal lattices were cubic, so all corresponding angles ( $\alpha$ ,  $\beta$ ,  $\gamma$ ) were  $90^\circ$ . Once the unit cell volume could be calculated, a number density was randomly-selected to determine the number of atom-sites with which to populate the unit cell. A lower limit was imposed so that each unit cell would be populated with at minimum two atom-sites or that the number density was at least  $0.0000149$  atoms/Å<sup>3</sup>. Each of these atom-sites was then assigned a random position within the unit cell. Chemical species, or pseudoatom-types, were defined by randomly-selected LJ parameters,  $\sigma$  and  $\epsilon$ . In this study each pseudomaterial was comprised of at most four different pseudoatom-types. Once all of the atom-sites were positioned within the unit cell, each was assigned a pseudoatom-type from one of the four available.

## S2. Simulation details

**Xenon loading.** Grand canonical Monte Carlo (GCMC) simulations were used to calculate Xe loading according to previously established methods.<sup>1,2</sup> In three separate runs, GCMC simulations were performed at 298K at various pressures (1 bar, 5 bar, and 10 bar). Each calculation used a 1000 cycle equilibration period followed by a 1000 cycle production run. A cycle consists of  $n$  Monte Carlo steps, where  $n$  equals the number of molecules in the system (which fluctuates). Simulations included insertion, deletion, and translation moves of molecules with equal probabilities. Fugacities were calculated using the Peng-Robinson equation of state. Xe loadings were reported as the absolute volumetric amount of gas in the pseudomaterial's void space.

**Void fraction.** GCMC simulations were also used to calculate void fraction in each pseudo material according to established methods.<sup>2</sup> Each simulation consisted of a 1000 cycle production run. Simulations used the Widom particle insertion method with a helium atom probe ( $\sigma=2.96\text{\AA}$ ). Average Rosenbluth weight was recorded for the void fraction of each pseudomaterial.

**Interaction potential.** Interaction energies from non-bonded atoms were computed through the Lennard-Jones potential:

$$V_{ij} = 4\epsilon_{ij} \left( \left( \frac{\sigma_{ij}}{r_{ij}} \right)^{12} - \left( \frac{\sigma_{ij}}{r_{ij}} \right)^6 \right)$$

where  $i$  and  $j$  are interacting atoms,  $r_{ij}$  is the distance between atoms  $i$  and  $j$ ,  $\sigma_{ij}$  is the LJ diameter, and  $\epsilon_{ij}$  is the LJ well depth. The LJ cutoff was  $12.8 \text{\AA}$ . Coloumbic interactions were ignored because of the electrostatic nature of the adsorbate, Xe. LJ parameters for framework pseudoatoms were selected at random from a range of values 50% larger than the UFF; values for Xe also come from the UFF. Table S2.1 presents the LJ parameters used for simulations in this study:

**Table S2.1** LJ parameters for framework pseudoatoms and Xe adsorbate atoms.

| <b>Atom type</b>   | <b><math>\sigma</math> (Å)</b> | <b><math>\epsilon/k_B</math> (K)</b> |
|--------------------|--------------------------------|--------------------------------------|
| <b>pseudoatoms</b> | 1.052 – 6.549                  | 1.258 - 513.264                      |
| <b>Xe</b>          | 3.69                           | 110.704                              |

### S3. Parent selection algorithm

In an attempt at encouraging new pseudomaterials with unique structure property combinations, rather than randomly-generating new pseudomaterials, unique pseudomaterials (already present in the library) are selected as parents and mutated. To select unique parents, first, the parameter-space was divided into 100 (10x10) congruent bins, which were weighted per the number of pseudomaterials in each bin:

$$w_i = \frac{\sum c_i}{c_i} = \text{bin-specific weight}$$

$$w_i^* = \frac{w_i}{\sum c_i} = \text{normalised bin-specific weight}$$

where  $c_i$  is the bin-count, or number of pseudomaterials in a particular bin. The normalized bin specific weights,  $w_i$ , were used then in the weighted random selection of the parent-bin. From the parent-bin one pseudomaterial was selected as a parent, where any pseudomaterial may be selected with equal probability. For more information on the random selection function used see the official Numpy documentation.<sup>3</sup>

#### S4. Mutation algorithm

Mutating pseudomaterials creates new materials by perturbing the values used to define the structural characteristics of some parent-pseudomaterial. As describe previously (Section S1), a pseudomaterial is defined by a collection of crystal lattice parameters ( $a$ ,  $b$ ,  $c$ ), some number of atom-site positions, and four pseudoatom-types (LJ parameters,  $\sigma$  and  $\varepsilon$ ), one assigned to each atom-site. Mutation simply refers to the process of systematically perturbing each of these values:

$$x_{new} = x_{old} \pm M * U([x_{min}, x_{max}])$$

where  $M$  is the mutation strength parameter and  $U([x_{min}, x_{max}])$  is a random variable from a uniform distribution across the limits for the value being perturbed. Perturbations are performed by selecting a random value and then selecting a new value between the original and random values. The greater the mutation strength, the closer the new value will be to the random value, such that a mutation strength of 0% creates a clone of the parent pseudomaterial and 100% creates a completely random pseudomaterial with no structural similarity to its parent. For more information on the uniform selection function used see the official Numpy documentation.<sup>4</sup>

## References:

- 1 A. Ö. Yazaydin, R. Q. Snurr, T.-H. Park, K. Koh, J. Liu, M. D. LeVan, A. I. Benin, P. Jakubczak, M. Lanuza, D. B. Galloway, J. J. Low and R. R. Willis, *J. Am. Chem. Soc.*, 2009, **131**, 18198–18199.
- 2 C. E. Wilmer, O. K. Farha, Y.-S. Bae, J. T. Hupp and R. Q. Snurr, *Energy Environ. Sci.*, 2012, **5**, 9849.
- 3 <https://docs.scipy.org/doc/numpy/reference/generated/numpy.random.choice.html>
- 4 <https://docs.scipy.org/doc/numpy/reference/generated/numpy.random.uniform.html>
